# Supplementary material for: Impact of Natural-Based Viscosity Modifiers of Inhalation Drugs on the Dynamic Surface Properties of the Pulmonary Surfactant
Source: MDPI journal article supplement (doi:10.3390/ma16051975), 2023-02-28
Supplement: s1 [file s1]

## Supplementary Materials

The determination of surface rheological parameters characterizing the dynamic state to which the air-liquid interface was introduced hold during cyclic deformation around the quasi-equilibrium surface tension. The dilatational elasticity,  $\varepsilon_d$  and viscosity,  $\mu_d$  referring to the storage and loss modulus, respectively are the basic criteria for testing the dynamic properties of the deformable interface.  $\varepsilon_d$  and  $\mu_d$  are commonly used in *in vitro* studies of pulmonary surfactants as the viscoelastic GLI properties enable tracking alterations of dynamic surface tension and hysteresis  $\sigma$ -A. A typical relationship shows that surface viscosity decreases and elasticity increases at higher surface deformation rates (i.e. higher oscillation frequency) (Figure S1).

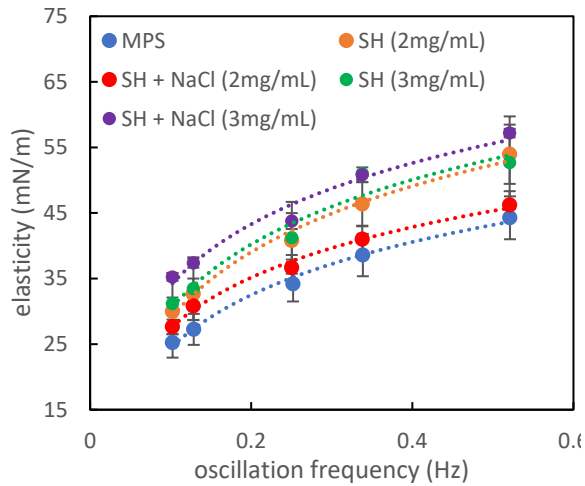

(A1)

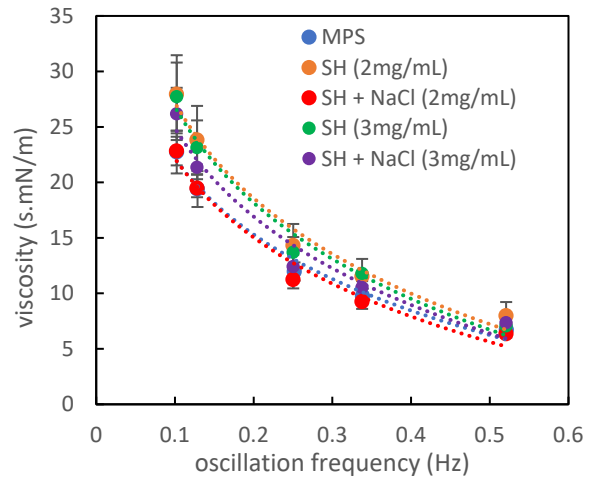

(A2)

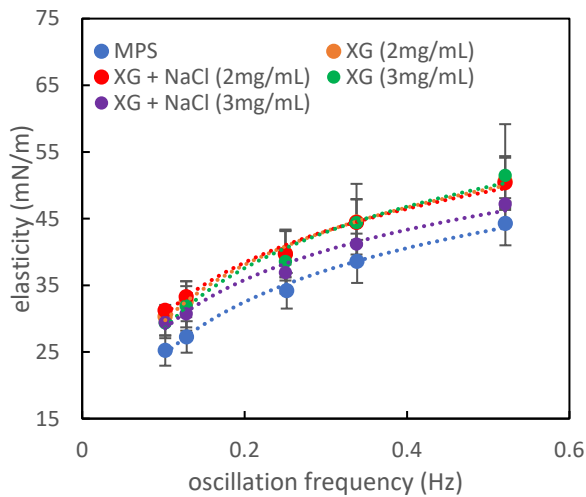

(B1)

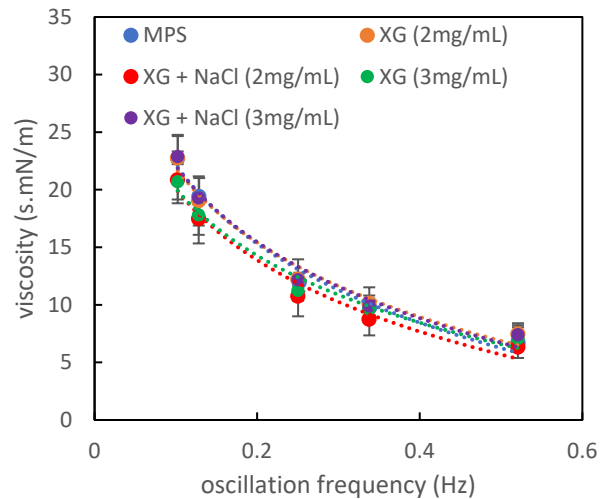

(B2)

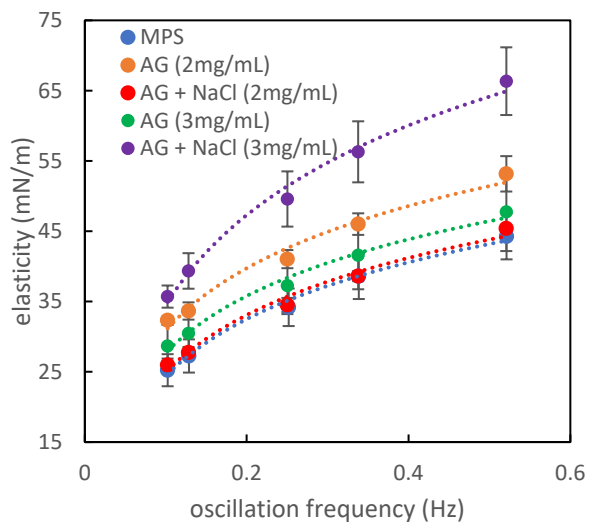

(C1)

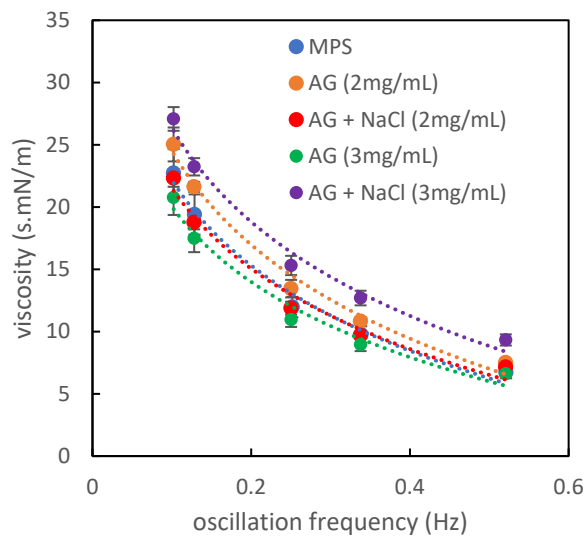

(C2)

**Figure S1.** The dilatational elasticity,  $\epsilon_d$  (1) and viscosity,  $\mu_d$  (2) of air-water or air-saline interface in presence of MPS and VM: (A1, A2) SH (B1, B2) XG (C1-C2) AG.
